# Supplementary material for: Transcriptome modulation by hydrocortisone in severe burn shock: ancillary analysis of a prospective randomized trial
Source: Springer Nature journal article supplement (doi:10.1186/s13054-017-1743-9), 2017-06-16

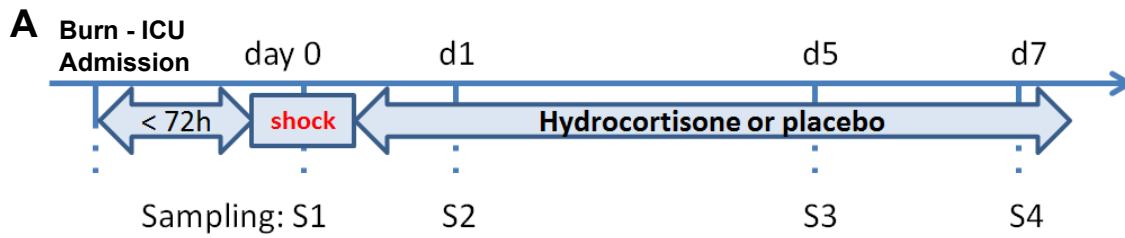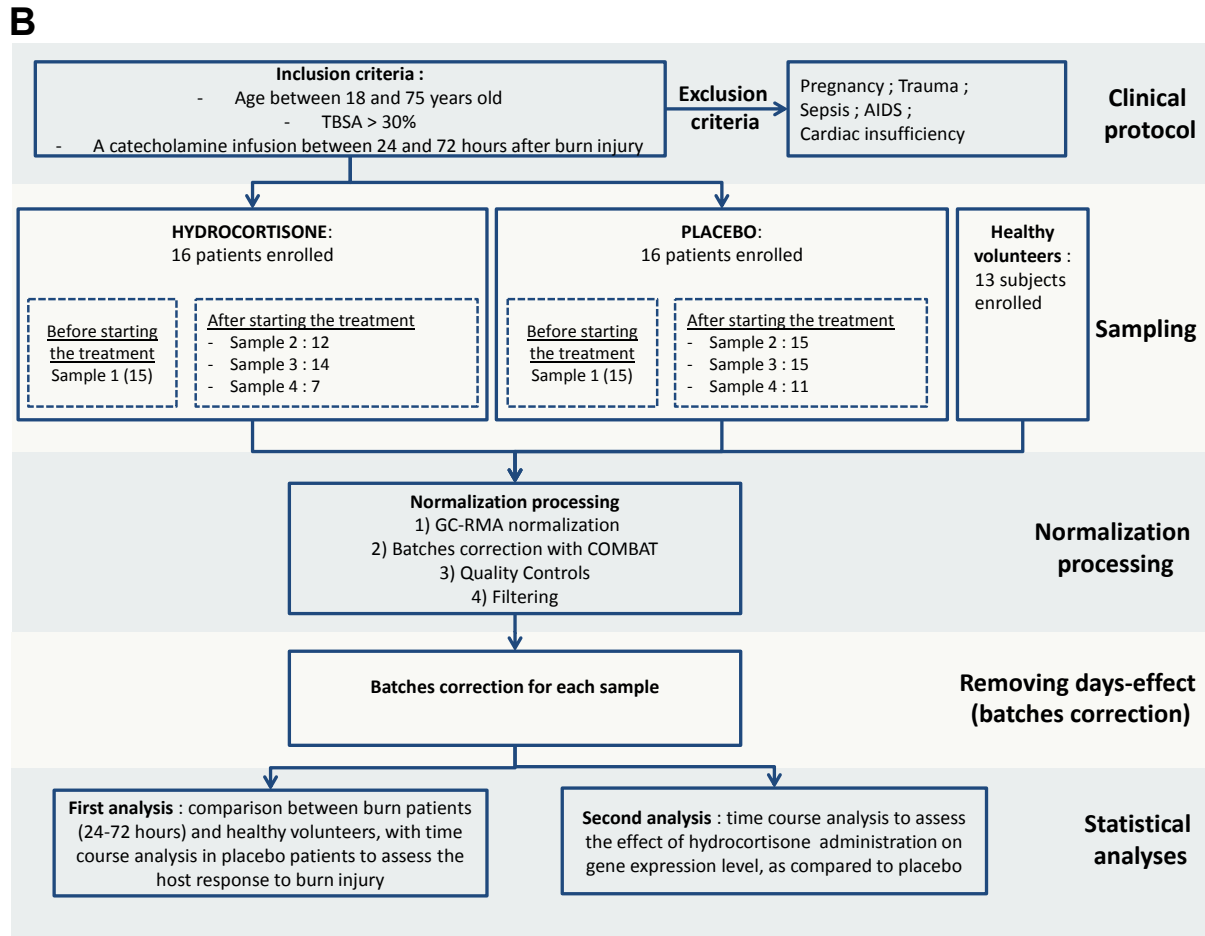

Supplement: MOESM1 [file 12451460]
